# Supplementary material
Source: PubMed Central journal article supplement (PMC8484688)
Supplement: mmc1.pdf [file mmc1.pdf]

**Cell Reports Medicine, Volume 2**

**Supplemental information**

**Fab and Fc contribute to maximal protection  
against SARS-CoV-2 following NVX-CoV2373  
subunit vaccine with Matrix-M vaccination**

**Matthew J. Gorman, Nita Patel, Mimi Guebre-Xabier, Alex L. Zhu, Caroline Atyeo, Krista M. Pullen, Carolin Loos, Yenny Goetz-Gazi, Ricardo Carrion Jr., Jing-Hui Tian, Dansu Yuan, Kathryn A. Bowman, Bin Zhou, Sonia Maciejewski, Marisa E. McGrath, James Logue, Matthew B. Frieman, David Montefiori, Colin Mann, Sharon Schendel, Fatima Amanat, Florian Krammer, Erica Ollmann Saphire, Douglas A. Lauffenburger, Ann M. Greene, Alyse D. Portnoff, Michael J. Massare, Larry Ellingsworth, Gregory Glenn, Gale Smith, and Galit Alter**

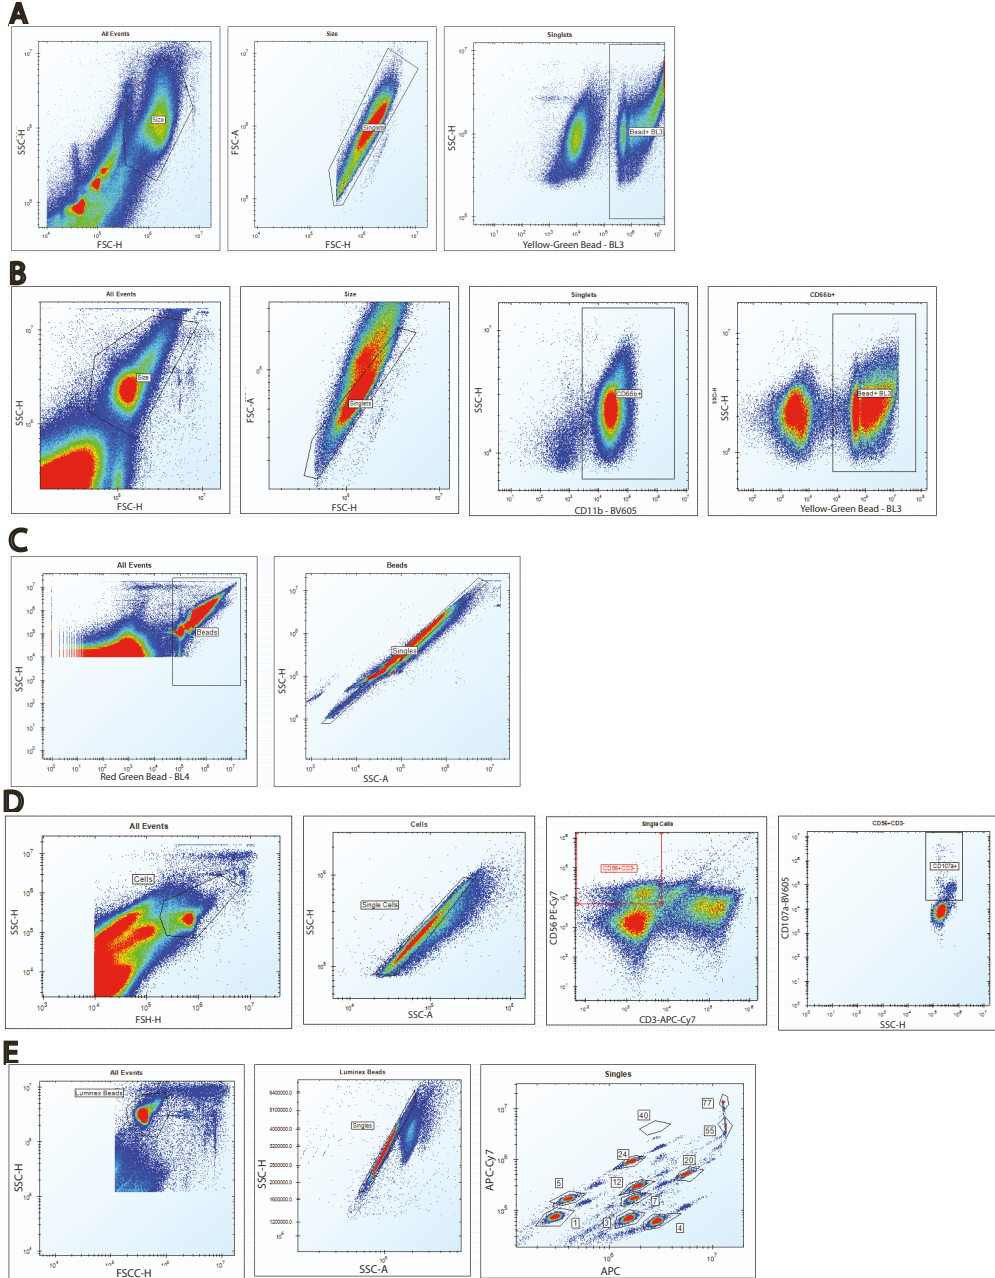

Supplementary Figure 1. Gating strategy for flow cytometry, Related to Figure 3. Example of flow cytometry gating scheme for (A) antibody-dependent cellular phagocytosis (ADCP), (B) antibody-dependent neutrophil phagocytosis (ADNP), (C) antibody-dependent complement deposition (ADCD), (D) antibody-dependent NK degranulation (measured by CD107%) (NKdegran), and (E) Luminex.
